# Supplementary material for: Retracted Article: Long non-coding RNA GACAT1 alleviates doxorubicin and vincristine resistance through a PTEN/AKT/mTOR/S6K1 regulatory pathway in gastric cancer
Source: Royal Society of Chemistry journal article supplement (doi:10.1039/c8ra10030f), 2019-01-01
Supplement: c8ra10030f1.pdf [file c8ra10030f1.pdf]

Supplementary Figure

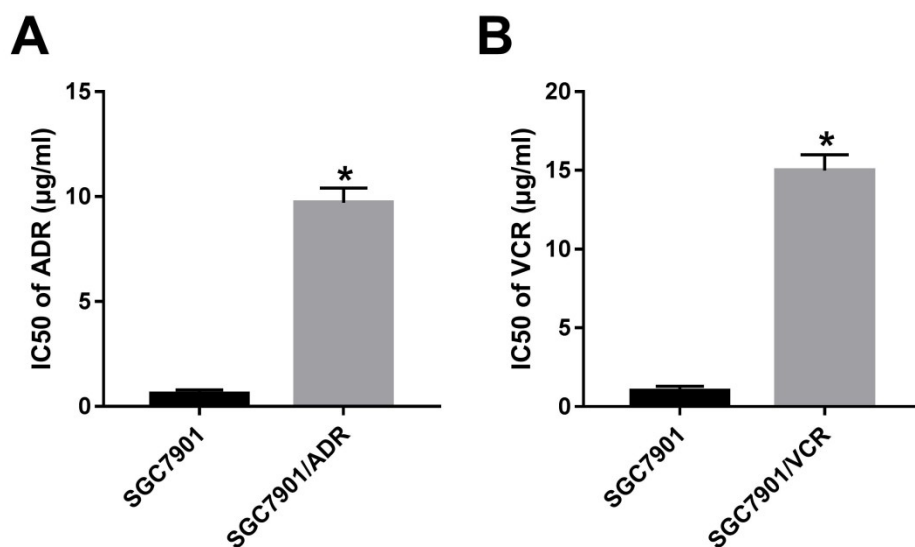

**Supplementary Fig. 1 ADR- or VCR-resistant SGC7901 cell lines were truly resistant to ADR or VCR.** (A) SGC7901 cells were treated with different concentrations of ADR (0, 0.2, 0.4, 0.8, 1.6, 3.2, 6.4 µg/ml) for 48 h and SGC7901/ADR cells were stimulated with different concentrations of ADR (0, 1, 2, 4, 8, 16 µg/ml) for 48 h. Then, the IC<sub>50</sub> value of ADR was determined by CCK-8 assay. (B) SGC7901 cells were stimulated with different doses of VCR (0, 0.4, 0.8, 1.6, 3.2, 6.4, 12.8 µg/ml) for 48 h and SGC7901/VCR cells were treated with various doses of VCR (0, 2, 4, 8, 16, 32 µg/ml) for 48 h. Then, the IC<sub>50</sub> value of VCR was determined by CCK-8 assay. \**P* < 0.05.

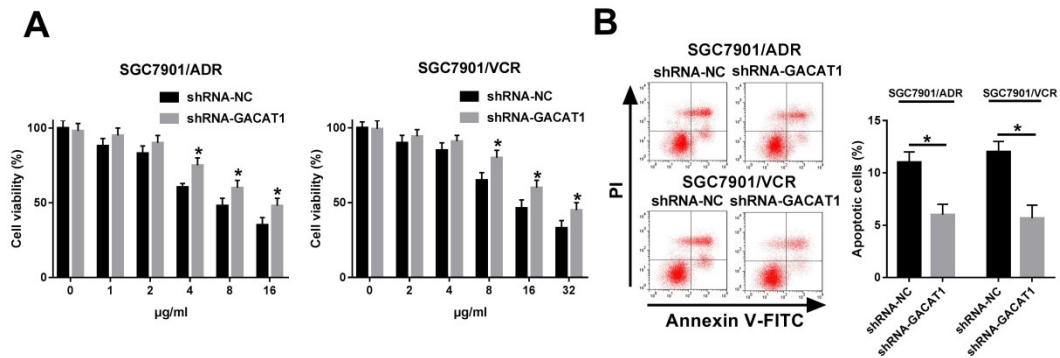

**Supplementary Fig. 2 GACAT1 knockdown enhanced the resistance of GC cells to ADR and VCR.** (A) SGC7901/ADR or SGC7901/VCR cells were infected with shRNA-NC or shRNA-GACAT1 for 24 h. Then, SGC7901/ADR cells were stimulated with different concentrations of ADR (0, 1, 2, 4, 8, 16 µg/ml) and SGC7901/VCR cells were treated with various doses of VCR (0, 2, 4, 8, 16, 32 µg/ml) for additional 48 h. Subsequently, cell viability was determined by CCK-8 assay. (B) SGC7901/ADR or SGC7901/VCR cells were infected with shRNA-NC or shRNA-GACAT1 for 24 h and then treated with ADR (2 µg/ml) or VCR (4 µg/ml) for another 48 h. Then, cell apoptotic percentage was determined through flow cytometry. \* $P < 0.05$ .

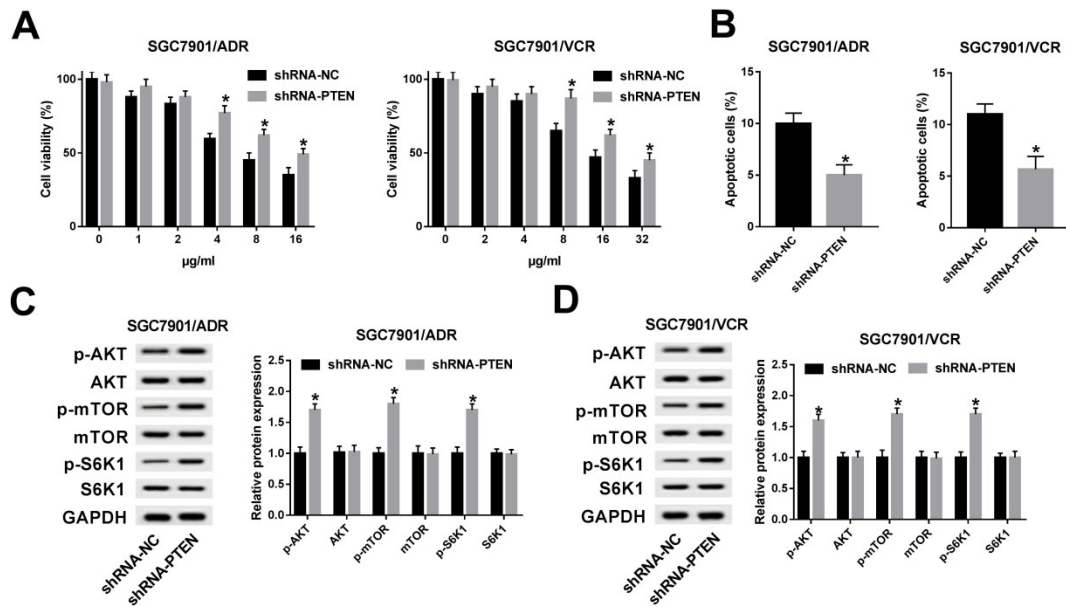

**Supplementary Fig. 3 PTEN loss enhanced ADR and VCR resistance by regulating PTEN/AKT/mTOR/S6K1 signaling pathway in GC cells.** (A) SGC7901/ADR or SGC7901/VCR cells were infected with shRNA-NC or shRNA-PTEN for 24 h and then treated with different concentrations of ADR or VCR for additional 48 h. Then, cell viability was measured by CCK-8 assay. (B-D) SGC7901/ADR or SGC7901/VCR cells were infected with shRNA-NC or shRNA-PTEN for 24 h and then treated with ADR (2 μg/ml) or VCR (4 μg/ml) for another 48 h. (B) Cell apoptotic percentage was examined through flow cytometry. (C and D) Protein levels of AKT, p-AKT, mTOR, p-mTOR, p-S6K1 and S6K1 were determined by western blot assay. \* $P < 0.05$ .
